# Supplementary material for: Health Sector Resource Mapping in Malawi: Sharing the Collection and Use of Budget Data for Evidence-Based Decision Making
Source: Glob Health Sci Pract. 2021 Dec 31;9(4):793–803. doi: 10.9745/GHSP-D-21-00232 (PMC8691869; doi:10.9745/GHSP-D-21-00232)
Supplement: 21-00232-Yoon-Supplement.xlsx [file 21-00232-Yoon-Supplement.xlsx]

## Sheet: Data Collection Template
Budget and Expenditure Data					Summary Table						Overall Completion Check
					FY Ending 2016 EXPENDITURE (Jan 2016 - Dec 2016)	FY Ending 2017 EXPENDITURE (Jan 2017 - Dec 2017)	FY Ending 2018 EXPENDITURE (Jan 2018 - Dec 2018)	FY Ending 2019 BUDGETS (Jan 2019 - Dec 2019)	FY Ending 2020 BUDGETS (Jan 2020 - Dec 2020)		Incomplete																		Month		1	0
					0	0	0	0	0
																													Month		Jan	Dec	"Please enter the start month of your fiscal year in the Organization Info Tab.","")
		Project and Activity		Financing Source and Implementers								Health Providers			Programmatic Function and Intervention										Cost Type				Expenditures and Budgets																	Geography
	Completion Check	Project Name	Description of Activity	Financing Source	If OTHER, please specify	Primary Implementing Agent List only one	Is there a sub-implementing agent?	If there is a sub-implementing agent, please specify and list only one	Have you correctly filled in columns F and I?	Multiple financing sources listed?	Section Complete?	Health Provider Level 1	Health Provider Level 2	Section Complete?	Programmatic Function	Programmatic Intervention Level 1	Programmatic Intervention Level 2	Programmatic Intervention Level 1 Code	EHP Intervention	NHA Disease Targeted	Health Care Function	Target Population HIV, TB, and Malaria Only	Does intervention match programmatic function?	Section Complete?	Cost Type	Cost Sub-Type	Factor of Provision	Section Complete?	Currency	FY Ending 2016 EXPENDITURE (Jan 2016 - Dec 2016)	FY Ending 2017 EXPENDITURE (Jan 2017 - Dec 2017)	FY Ending 2018 EXPENDITURE (Jan 2018 - Dec 2018)	FY Ending 2019 BUDGETS (Jan 2019 - Dec 2019)	FY Ending 2020 BUDGETS (Jan 2020 - Dec 2020)	Exchange rate to USD	FY Ending 2016 EXPENDITURE USD (Jan 2016 - Dec 2016)	FY Ending 2017 EXPENDITURE USD (Jan 2017 - Dec 2017)	FY Ending 2018 EXPENDITURE USD (Jan 2018 - Dec 2018)	FY Ending 2019 BUDGETS USD (Jan 2019 - Dec 2019)	FY Ending 2020 BUDGETS USD (Jan 2020 - Dec 2020)	Warning - Some Years Blank	Warning - Zero Funding in Some Years	Need manual bypass 1?	If you have yellow warnings, please check and select "Warnings noted" here if your entries are correct	Section Complete?	Central Level	Kamuzu Central Hospital	Mzuzu Central Hospital	Queen Elizabeth Central Hospital
	Complete	EXAMPLE - MWI Comprehensive Sexuality Education and FP for Adolescents and Women	EXAMPLE - Conduct training of 165 HSAs and their supervisors on family planning hormonal methods	EXAMPLE - European Union		EXAMPLE - Save the Children	EXAMPLE - No		OK	OK	Complete	EXAMPLE - Rest of the world	EXAMPLE - Rest of the world	Complete	EXAMPLE - Reproductive, Maternal, Newborn and Child Health	EXAMPLE - Family Planning	EXAMPLE - Hormonal Methods (e.g. implants, injectables, IUD, the pill)						OK	Complete	EXAMPLE - Human Resources for Health	EXAMPLE - Health worker training - in-service		Complete	EUR	0	11631	11631	11631	11631	0.88969	0	13073.1	13073.1	13073.1	13073.1	OK	OK	Bypass_No	OK	Complete
																																											Not_there_yet
																																											Not_there_yet
																																											Not_there_yet
																																											Not_there_yet
																																											Not_there_yet
																																											Not_there_yet
																																											Not_there_yet
																																											Not_there_yet
																																											Not_there_yet
																																											Not_there_yet
																																											Not_there_yet
																																											Not_there_yet
																																											Not_there_yet
																																											Not_there_yet
																																											Not_there_yet
																																											Not_there_yet
																																											Not_there_yet
																																											Not_there_yet
																																											Not_there_yet
																																											Not_there_yet
																																											Not_there_yet
																																											Not_there_yet
																																											Not_there_yet
																																											Not_there_yet
																																											Not_there_yet
																																											Not_there_yet
																																											Not_there_yet
																																											Not_there_yet
																																											Not_there_yet
																																											Not_there_yet
																																											Not_there_yet
																																											Not_there_yet
																																											Not_there_yet
																																											Not_there_yet
																																											Not_there_yet
																																											Not_there_yet
																																											Not_there_yet
																																											Not_there_yet
																																											Not_there_yet
																																											Not_there_yet
																																											Not_there_yet
																																											Not_there_yet
																																											Not_there_yet
																																											Not_there_yet
																																											Not_there_yet
																																											Not_there_yet
																																											Not_there_yet
																																											Not_there_yet
																																											Not_there_yet
																																											Not_there_yet
																																											Not_there_yet
																																											Not_there_yet
																																											Not_there_yet
																																											Not_there_yet
																																											Not_there_yet
																																											Not_there_yet
																																											Not_there_yet
																																											Not_there_yet
																																											Not_there_yet
																																											Not_there_yet
																																											Not_there_yet
																																											Not_there_yet
																																											Not_there_yet
																																											Not_there_yet
																																											Not_there_yet
																																											Not_there_yet
																																											Not_there_yet
																																											Not_there_yet
																																											Not_there_yet
																																											Not_there_yet
																																											Not_there_yet
																																											Not_there_yet
																																											Not_there_yet
																																											Not_there_yet
																																											Not_there_yet
																																											Not_there_yet
																																											Not_there_yet
																																											Not_there_yet
																																											Not_there_yet
																																											Not_there_yet
																																											Not_there_yet
																																											Not_there_yet
																																											Not_there_yet
																																											Not_there_yet
																																											Not_there_yet
																																											Not_there_yet
																																											Not_there_yet
																																											Not_there_yet
																																											Not_there_yet
																																											Not_there_yet
																																											Not_there_yet
																																											Not_there_yet
																																											Not_there_yet
																																											Not_there_yet
																																											Not_there_yet
																																											Not_there_yet
																																											Not_there_yet
																																											Not_there_yet
																																											Not_there_yet
																																											Not_there_yet
																																											Not_there_yet
																																											Not_there_yet
																																											Not_there_yet
																																											Not_there_yet
																																											Not_there_yet
																																											Not_there_yet
																																											Not_there_yet
																																											Not_there_yet
																																											Not_there_yet
																																											Not_there_yet
																																											Not_there_yet
																																											Not_there_yet
																																											Not_there_yet
																																											Not_there_yet
																																											Not_there_yet
																																											Not_there_yet
																																											Not_there_yet
																																											Not_there_yet
																																											Not_there_yet
																																											Not_there_yet
																																											Not_there_yet
																																											Not_there_yet
																																											Not_there_yet
																																											Not_there_yet
																																											Not_there_yet
																																											Not_there_yet
																																											Not_there_yet
																																											Not_there_yet
																																											Not_there_yet
																																											Not_there_yet
																																											Not_there_yet
																																											Not_there_yet
																																											Not_there_yet
																																											Not_there_yet
																																											Not_there_yet
																																											Not_there_yet
																																											Not_there_yet
																																											Not_there_yet
																																											Not_there_yet
																																											Not_there_yet
																																											Not_there_yet
																																											Not_there_yet
																																											Not_there_yet
																																											Not_there_yet
																																											Not_there_yet
																																											Not_there_yet
																																											Not_there_yet
																																											Not_there_yet
																																											Not_there_yet
																																											Not_there_yet
																																											Not_there_yet
																																											Not_there_yet
																																											Not_there_yet
																																											Not_there_yet
																																											Not_there_yet
																																											Not_there_yet
																																											Not_there_yet
																																											Not_there_yet
																																											Not_there_yet
																																											Not_there_yet
																																											Not_there_yet
																																											Not_there_yet
																																											Not_there_yet
																																											Not_there_yet
																																											Not_there_yet
																																											Not_there_yet
																																											Not_there_yet
																																											Not_there_yet
																																											Not_there_yet
																																											Not_there_yet
																																											Not_there_yet
																																											Not_there_yet
																																											Not_there_yet
																																											Not_there_yet
																																											Not_there_yet
																																											Not_there_yet
																																											Not_there_yet
																																											Not_there_yet
																																											Not_there_yet
																																											Not_there_yet
																																											Not_there_yet
																																											Not_there_yet
																																											Not_there_yet
																																											Not_there_yet
																																											Not_there_yet
																																											Not_there_yet
																																											Not_there_yet
																																											Not_there_yet
																																											Not_there_yet
																																											Not_there_yet
																																											Not_there_yet
																																											Not_there_yet
																																											Not_there_yet
																																											Not_there_yet
																																											Not_there_yet
																																											Not_there_yet
																																											Not_there_yet
																																											Not_there_yet
																																											Not_there_yet
																																											Not_there_yet
																																											Not_there_yet
																																											Not_there_yet
																																											Not_there_yet
																																											Not_there_yet
																																											Not_there_yet
																																											Not_there_yet
																																											Not_there_yet
																																											Not_there_yet
																																											Not_there_yet
																																											Not_there_yet
																																											Not_there_yet
																																											Not_there_yet
																																											Not_there_yet
																																											Not_there_yet
																																											Not_there_yet
																																											Not_there_yet
																																											Not_there_yet
																																											Not_there_yet
																																											Not_there_yet
																																											Not_there_yet
																																											Not_there_yet
																																											Not_there_yet
																																											Not_there_yet
																																											Not_there_yet
																																											Not_there_yet
																																											Not_there_yet
																																											Not_there_yet
																																											Not_there_yet
																																											Not_there_yet
																																											Not_there_yet
																																											Not_there_yet
																																											Not_there_yet
																																											Not_there_yet
																																											Not_there_yet
																																											Not_there_yet
																																											Not_there_yet
																																											Not_there_yet
																																											Not_there_yet
																																											Not_there_yet
																																											Not_there_yet
																																											Not_there_yet
																																											Not_there_yet
																																											Not_there_yet
																																											Not_there_yet
																																											Not_there_yet
																																											Not_there_yet
																																											Not_there_yet
																																											Not_there_yet
																																											Not_there_yet
																																											Not_there_yet
																																											Not_there_yet
																																											Not_there_yet
																																											Not_there_yet
																																											Not_there_yet
																																											Not_there_yet
																																											Not_there_yet
																																											Not_there_yet
																																											Not_there_yet
																																											Not_there_yet
																																											Not_there_yet
																																											Not_there_yet
																																											Not_there_yet
																																											Not_there_yet
																																											Not_there_yet
																																											Not_there_yet
																																											Not_there_yet
																																											Not_there_yet
																																											Not_there_yet
																																											Not_there_yet
																																											Not_there_yet
																																											Not_there_yet
																																											Not_there_yet
																																											Not_there_yet
																																											Not_there_yet
																																											Not_there_yet
																																											Not_there_yet
																																											Not_there_yet
																																											Not_there_yet
																																											Not_there_yet
																																											Not_there_yet
																																											Not_there_yet
																																											Not_there_yet
																																											Not_there_yet
																																											Not_there_yet
																																											Not_there_yet
																																											Not_there_yet
																																											Not_there_yet
																																											Not_there_yet
																																											Not_there_yet
																																											Not_there_yet
																																											Not_there_yet
																																											Not_there_yet
																																											Not_there_yet
																																											Not_there_yet
																																											Not_there_yet
																																											Not_there_yet
																																											Not_there_yet
																																											Not_there_yet
																																											Not_there_yet
																																											Not_there_yet
																																											Not_there_yet
																																											Not_there_yet
																																											Not_there_yet
																																											Not_there_yet
																																											Not_there_yet
																																											Not_there_yet
																																											Not_there_yet
																																											Not_there_yet
																																											Not_there_yet
																																											Not_there_yet
																																											Not_there_yet
																																											Not_there_yet
																																											Not_there_yet
																																											Not_there_yet
																																											Not_there_yet
																																											Not_there_yet
																																											Not_there_yet
																																											Not_there_yet
																																											Not_there_yet
																																											Not_there_yet
																																											Not_there_yet
																																											Not_there_yet
																																											Not_there_yet
																																											Not_there_yet
																																											Not_there_yet
																																											Not_there_yet
																																											Not_there_yet
																																											Not_there_yet
																																											Not_there_yet
																																											Not_there_yet
																																											Not_there_yet
																																											Not_there_yet
																																											Not_there_yet
																																											Not_there_yet
																																											Not_there_yet
																																											Not_there_yet
																																											Not_there_yet
																																											Not_there_yet
																																											Not_there_yet
																																											Not_there_yet
																																											Not_there_yet
																																											Not_there_yet
																																											Not_there_yet
																																											Not_there_yet
																																											Not_there_yet
																																											Not_there_yet
																																											Not_there_yet
																																											Not_there_yet
																																											Not_there_yet
																																											Not_there_yet
																																											Not_there_yet
																																											Not_there_yet
																																											Not_there_yet
																																											Not_there_yet
																																											Not_there_yet
																																											Not_there_yet
																																											Not_there_yet
																																											Not_there_yet
																																											Not_there_yet
																																											Not_there_yet
																																											Not_there_yet
																																											Not_there_yet
																																											Not_there_yet
																																											Not_there_yet
																																											Not_there_yet
																																											Not_there_yet
																																											Not_there_yet
																																											Not_there_yet
																																											Not_there_yet
																																											Not_there_yet
																																											Not_there_yet
																																											Not_there_yet
																																											Not_there_yet
																																											Not_there_yet
																																											Not_there_yet
																																											Not_there_yet
																																											Not_there_yet
																																											Not_there_yet
																																											Not_there_yet
																																											Not_there_yet
																																											Not_there_yet
																																											Not_there_yet
																																											Not_there_yet
																																											Not_there_yet
																																											Not_there_yet
																																											Not_there_yet
																																											Not_there_yet
																																											Not_there_yet
																																											Not_there_yet
																																											Not_there_yet
																																											Not_there_yet
																																											Not_there_yet
																																											Not_there_yet
																																											Not_there_yet
																																											Not_there_yet
																																											Not_there_yet
																																											Not_there_yet
																																											Not_there_yet
																																											Not_there_yet
																																											Not_there_yet
																																											Not_there_yet
																																											Not_there_yet
																																											Not_there_yet
																																											Not_there_yet
																																											Not_there_yet
																																											Not_there_yet
																																											Not_there_yet
																																											Not_there_yet
																																											Not_there_yet
																																											Not_there_yet
																																											Not_there_yet
																																											Not_there_yet
																																											Not_there_yet
																																											Not_there_yet
																																											Not_there_yet
																																											Not_there_yet
																																											Not_there_yet
																																											Not_there_yet
																																											Not_there_yet
																																											Not_there_yet
																																											Not_there_yet
																																											Not_there_yet
																																											Not_there_yet
																																											Not_there_yet
																																											Not_there_yet
																																											Not_there_yet
																																											Not_there_yet
																																											Not_there_yet
																																											Not_there_yet
																																											Not_there_yet
																																											Not_there_yet
																																											Not_there_yet
																																											Not_there_yet
																																											Not_there_yet
																																											Not_there_yet
																																											Not_there_yet
																																											Not_there_yet
																																											Not_there_yet
																																											Not_there_yet
																																											Not_there_yet
																																											Not_there_yet
																																											Not_there_yet
																																											Not_there_yet
																																											Not_there_yet
																																											Not_there_yet
																																											Not_there_yet
																																											Not_there_yet
																																											Not_there_yet
																																											Not_there_yet
																																											Not_there_yet
																																											Not_there_yet
																																											Not_there_yet
																																											Not_there_yet
																																											Not_there_yet
																																											Not_there_yet
																																											Not_there_yet
																																											Not_there_yet
																																											Not_there_yet
																																											Not_there_yet
																																											Not_there_yet
																																											Not_there_yet
																																											Not_there_yet
																																											Not_there_yet
																																											Not_there_yet
																																											Not_there_yet
																																											Not_there_yet
																																											Not_there_yet
																																											Not_there_yet
																																											Not_there_yet
																																											Not_there_yet
																																											Not_there_yet
																																											Not_there_yet
																																											Not_there_yet
																																											Not_there_yet
																																											Not_there_yet
																																											Not_there_yet
																																											Not_there_yet
																																											Not_there_yet
																																											Not_there_yet
																																											Not_there_yet
																																											Not_there_yet
																																											Not_there_yet
																																											Not_there_yet
																																											Not_there_yet
																																											Not_there_yet
																																											Not_there_yet
																																											Not_there_yet
																																											Not_there_yet
																																											Not_there_yet
																																											Not_there_yet
																																											Not_there_yet
																																											Not_there_yet
																																											Not_there_yet
																																											Not_there_yet
																																											Not_there_yet
																																											Not_there_yet
																																											Not_there_yet
																																											Not_there_yet
																																											Not_there_yet
																																											Not_there_yet
																																											Not_there_yet
																																											Not_there_yet
																																											Not_there_yet
																																											Not_there_yet
																																											Not_there_yet
																																											Not_there_yet
																																											Not_there_yet
																																											Not_there_yet
																																											Not_there_yet
																																											Not_there_yet
																																											Not_there_yet
																																											Not_there_yet
																																											Not_there_yet
																																											Not_there_yet
																																											Not_there_yet
																																											Not_there_yet
																																											Not_there_yet
																																											Not_there_yet
																																											Not_there_yet
																																											Not_there_yet
																																											Not_there_yet
																																											Not_there_yet
																																											Not_there_yet
																																											Not_there_yet
																																											Not_there_yet
																																											Not_there_yet
																																											Not_there_yet
																																											Not_there_yet
																																											Not_there_yet
																																											Not_there_yet
																																											Not_there_yet
																																											Not_there_yet
																																											Not_there_yet
																																											Not_there_yet
																																											Not_there_yet
																																											Not_there_yet
																																											Not_there_yet
																																											Not_there_yet
																																											Not_there_yet
																																											Not_there_yet
																																											Not_there_yet
																																											Not_there_yet
																																											Not_there_yet
																																											Not_there_yet
																																											Not_there_yet
																																											Not_there_yet
																																											Not_there_yet
																																											Not_there_yet
																																											Not_there_yet
																																											Not_there_yet
																																											Not_there_yet
																																											Not_there_yet
																																											Not_there_yet
																																											Not_there_yet
																																											Not_there_yet
																																											Not_there_yet
																																											Not_there_yet
																																											Not_there_yet
																																											Not_there_yet
																																											Not_there_yet
																																											Not_there_yet
																																											Not_there_yet
																																											Not_there_yet
																																											Not_there_yet
																																											Not_there_yet
																																											Not_there_yet
																																											Not_there_yet
																																											Not_there_yet
																																											Not_there_yet
																																											Not_there_yet
																																											Not_there_yet
																																											Not_there_yet
																																											Not_there_yet
																																											Not_there_yet
																																											Not_there_yet
																																											Not_there_yet
																																											Not_there_yet
																																											Not_there_yet
																																											Not_there_yet
																																											Not_there_yet
																																											Not_there_yet
																																											Not_there_yet
																																											Not_there_yet
																																											Not_there_yet
																																											Not_there_yet
																																											Not_there_yet
																																											Not_there_yet
																																											Not_there_yet
																																											Not_there_yet
																																											Not_there_yet
																																											Not_there_yet
																																											Not_there_yet
																																											Not_there_yet
																																											Not_there_yet
																																											Not_there_yet
																																											Not_there_yet
																																											Not_there_yet
																																											Not_there_yet
																																											Not_there_yet
																																											Not_there_yet
																																											Not_there_yet
																																											Not_there_yet
																																											Not_there_yet
																																											Not_there_yet
																																											Not_there_yet
																																											Not_there_yet
																																											Not_there_yet
																																											Not_there_yet
																																											Not_there_yet
																																											Not_there_yet
																																											Not_there_yet
																																											Not_there_yet
																																											Not_there_yet
																																											Not_there_yet
																																											Not_there_yet
																																											Not_there_yet
																																											Not_there_yet
																																											Not_there_yet
																																											Not_there_yet
																																											Not_there_yet
																																											Not_there_yet
																																											Not_there_yet
																																											Not_there_yet
																																											Not_there_yet
																																											Not_there_yet
																																											Not_there_yet
																																											Not_there_yet
																																											Not_there_yet
																																											Not_there_yet
																																											Not_there_yet
																																											Not_there_yet
																																											Not_there_yet
																																											Not_there_yet
																																											Not_there_yet
																																											Not_there_yet
																																											Not_there_yet
																																											Not_there_yet
																																											Not_there_yet
																																											Not_there_yet
																																											Not_there_yet
																																											Not_there_yet
																																											Not_there_yet
																																											Not_there_yet
																																											Not_there_yet
																																											Not_there_yet
																																											Not_there_yet
																																											Not_there_yet
																																											Not_there_yet
																																											Not_there_yet
																																											Not_there_yet
																																											Not_there_yet
																																											Not_there_yet
																																											Not_there_yet
																																											Not_there_yet
																																											Not_there_yet
																																											Not_there_yet
																																											Not_there_yet
																																											Not_there_yet
																																											Not_there_yet
																																											Not_there_yet
																																											Not_there_yet
																																											Not_there_yet
																																											Not_there_yet
																																											Not_there_yet
																																											Not_there_yet
																																											Not_there_yet
																																											Not_there_yet
																																											Not_there_yet
																																											Not_there_yet
																																											Not_there_yet
																																											Not_there_yet
																																											Not_there_yet
																																											Not_there_yet
																																											Not_there_yet
																																											Not_there_yet
																																											Not_there_yet
																																											Not_there_yet
																																											Not_there_yet
																																											Not_there_yet
																																											Not_there_yet
																																											Not_there_yet
																																											Not_there_yet
																																											Not_there_yet
																																											Not_there_yet
																																											Not_there_yet
																																											Not_there_yet
																																											Not_there_yet
																																											Not_there_yet
																																											Not_there_yet
																																											Not_there_yet
																																											Not_there_yet
																																											Not_there_yet
																																											Not_there_yet
																																											Not_there_yet
																																											Not_there_yet
																																											Not_there_yet
																																											Not_there_yet
																																											Not_there_yet
																																											Not_there_yet
																																											Not_there_yet
																																											Not_there_yet
																																											Not_there_yet
																																											Not_there_yet
																																											Not_there_yet
																																											Not_there_yet
																																											Not_there_yet
																																											Not_there_yet
																																											Not_there_yet
																																											Not_there_yet
																																											Not_there_yet
																																											Not_there_yet
																																											Not_there_yet
																																											Not_there_yet
																																											Not_there_yet
																																											Not_there_yet
																																											Not_there_yet
																																											Not_there_yet
																																											Not_there_yet
																																											Not_there_yet
																																											Not_there_yet
																																											Not_there_yet
																																											Not_there_yet
																																											Not_there_yet
																																											Not_there_yet
																																											Not_there_yet
																																											Not_there_yet
																																											Not_there_yet
																																											Not_there_yet
																																											Not_there_yet
																																											Not_there_yet
																																											Not_there_yet
																																											Not_there_yet
																																											Not_there_yet
																																											Not_there_yet
																																											Not_there_yet
																																											Not_there_yet
																																											Not_there_yet
																																											Not_there_yet
																																											Not_there_yet
																																											Not_there_yet
																																											Not_there_yet
																																											Not_there_yet
																																											Not_there_yet
																																											Not_there_yet
																																											Not_there_yet
																																											Not_there_yet
																																											Not_there_yet
																																											Not_there_yet
																																											Not_there_yet
																																											Not_there_yet
																																											Not_there_yet
																																											Not_there_yet
																																											Not_there_yet
																																											Not_there_yet
																																											Not_there_yet
																																											Not_there_yet
																																											Not_there_yet
																																											Not_there_yet
																																											Not_there_yet
																																											Not_there_yet
																																											Not_there_yet
																																											Not_there_yet
																																											Not_there_yet
																																											Not_there_yet
																																											Not_there_yet
																																											Not_there_yet
																																											Not_there_yet
																																											Not_there_yet
																																											Not_there_yet
																																											Not_there_yet
																																											Not_there_yet
																																											Not_there_yet
																																											Not_there_yet
																																											Not_there_yet
																																											Not_there_yet
																																											Not_there_yet
																																											Not_there_yet
																																											Not_there_yet
																																											Not_there_yet
																																											Not_there_yet
																																											Not_there_yet
																																											Not_there_yet
																																											Not_there_yet
																																											Not_there_yet
																																											Not_there_yet
																																											Not_there_yet
																																											Not_there_yet
																																											Not_there_yet
																																											Not_there_yet
																																											Not_there_yet
																																											Not_there_yet
																																											Not_there_yet
																																											Not_there_yet
																																											Not_there_yet
																																											Not_there_yet
																																											Not_there_yet
																																											Not_there_yet
																																											Not_there_yet
																																											Not_there_yet
																																											Not_there_yet
																																											Not_there_yet
																																											Not_there_yet
																																											Not_there_yet
																																											Not_there_yet
																																											Not_there_yet
																																											Not_there_yet
																																											Not_there_yet
																																											Not_there_yet
																																											Not_there_yet
																																											Not_there_yet
																																											Not_there_yet
																																											Not_there_yet
																																											Not_there_yet
																																											Not_there_yet
																																											Not_there_yet
																																											Not_there_yet
																																											Not_there_yet
																																											Not_there_yet
																																											Not_there_yet
																																											Not_there_yet
																																											Not_there_yet
																																											Not_there_yet
																																											Not_there_yet
																																											Not_there_yet
																																											Not_there_yet
																																											Not_there_yet
																																											Not_there_yet
																																											Not_there_yet
																																											Not_there_yet
																																											Not_there_yet
																																											Not_there_yet
																																											Not_there_yet
																																											Not_there_yet
																																											Not_there_yet
																																											Not_there_yet
																																											Not_there_yet
																																											Not_there_yet
																																											Not_there_yet
																																											Not_there_yet
																																											Not_there_yet
																																											Not_there_yet
																																											Not_there_yet
																																											Not_there_yet
																																											Not_there_yet
																																											Not_there_yet
																																											Not_there_yet
																																											Not_there_yet
																																											Not_there_yet
																																											Not_there_yet
																																											Not_there_yet
																																											Not_there_yet
																																											Not_there_yet
																																											Not_there_yet
																																											Not_there_yet
																																											Not_there_yet
																																											Not_there_yet
																																											Not_there_yet
																																											Not_there_yet
																																											Not_there_yet
																																											Not_there_yet
																																											Not_there_yet
																																											Not_there_yet
																																											Not_there_yet
																																											Not_there_yet
																																											Not_there_yet
																																											Not_there_yet
																																											Not_there_yet
																																											Not_there_yet
																																											Not_there_yet
																																											Not_there_yet
																																											Not_there_yet
																																											Not_there_yet
																																											Not_there_yet
																																											Not_there_yet
																																											Not_there_yet
																																											Not_there_yet
																																											Not_there_yet
																																											Not_there_yet
																																											Not_there_yet
																																											Not_there_yet
																																											Not_there_yet
																																											Not_there_yet
																																											Not_there_yet
																																											Not_there_yet
																																											Not_there_yet
																																											Not_there_yet
																																											Not_there_yet
																																											Not_there_yet
																																											Not_there_yet
																																											Not_there_yet
																																											Not_there_yet
																																											Not_there_yet
																																											Not_there_yet
																																											Not_there_yet
																																											Not_there_yet
																																											Not_there_yet
																																											Not_there_yet
																																											Not_there_yet
																																											Not_there_yet
																																											Not_there_yet
																																											Not_there_yet
																																											Not_there_yet
																																											Not_there_yet
																																											Not_there_yet
																																											Not_there_yet
																																											Not_there_yet
																																											Not_there_yet
																																											Not_there_yet
																																											Not_there_yet
																																											Not_there_yet
																																											Not_there_yet
																																											Not_there_yet
																																											Not_there_yet
																																											Not_there_yet
																																											Not_there_yet
																																											Not_there_yet
																																											Not_there_yet
																																											Not_there_yet
																																											Not_there_yet
																																											Not_there_yet
																																											Not_there_yet
																																											Not_there_yet
																																											Not_there_yet
																																											Not_there_yet
																																											Not_there_yet
																																											Not_there_yet
																																											Not_there_yet
																																											Not_there_yet
																																											Not_there_yet
																																											Not_there_yet
																																											Not_there_yet
																																											Not_there_yet
																																											Not_there_yet
																																											Not_there_yet
																																											Not_there_yet
																																											Not_there_yet
																																											Not_there_yet
																																											Not_there_yet
																																											Not_there_yet
																																											Not_there_yet
																																											Not_there_yet
																																											Not_there_yet
																																											Not_there_yet
																																											Not_there_yet
																																											Not_there_yet
																																											Not_there_yet
																																											Not_there_yet
																																											Not_there_yet
																																											Not_there_yet
																																											Not_there_yet
																																											Not_there_yet
																																											Not_there_yet
																																											Not_there_yet
																																											Not_there_yet
																																											Not_there_yet
																																											Not_there_yet
																																											Not_there_yet
																																											Not_there_yet
																																											Not_there_yet
																																											Not_there_yet
																																											Not_there_yet
																																											Not_there_yet
																																											Not_there_yet
																																											Not_there_yet
																																											Not_there_yet
																																											Not_there_yet
																																											Not_there_yet
																																											Not_there_yet
																																											Not_there_yet
																																											Not_there_yet
																																											Not_there_yet
																																											Not_there_yet
																																											Not_there_yet
																																											Not_there_yet
																																											Not_there_yet
																																											Not_there_yet
																																											Not_there_yet
																																											Not_there_yet
																																											Not_there_yet
																																											Not_there_yet
																																											Not_there_yet
																																											Not_there_yet
																																											Not_there_yet
																																											Not_there_yet
																																											Not_there_yet
																																											Not_there_yet
																																											Not_there_yet
																																											Not_there_yet
																																											Not_there_yet
																																											Not_there_yet
																																											Not_there_yet
																																											Not_there_yet
																																											Not_there_yet
																																											Not_there_yet
																																											Not_there_yet
[truncated: 55 more columns]
